# Supplementary material
Source: Springer Nature journal article supplement (https://www.springermedizin.de/resource/supplementary/12865_2009_254_MOESM3_ESM.pdf/9427616)

A

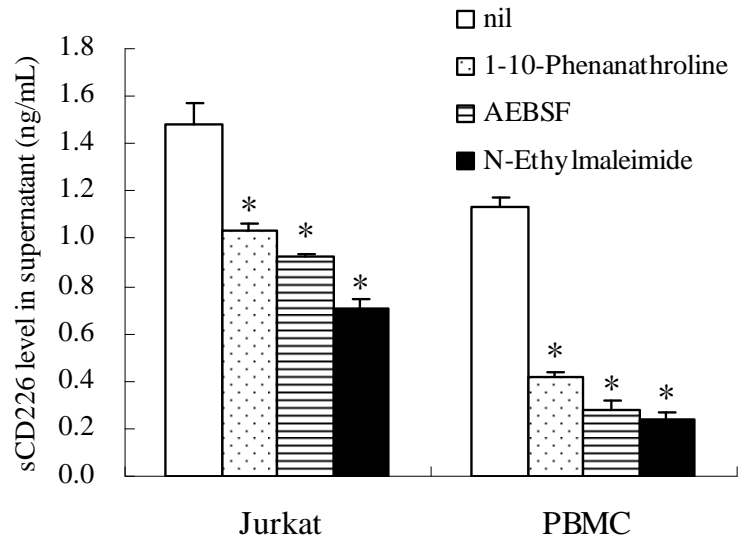

B

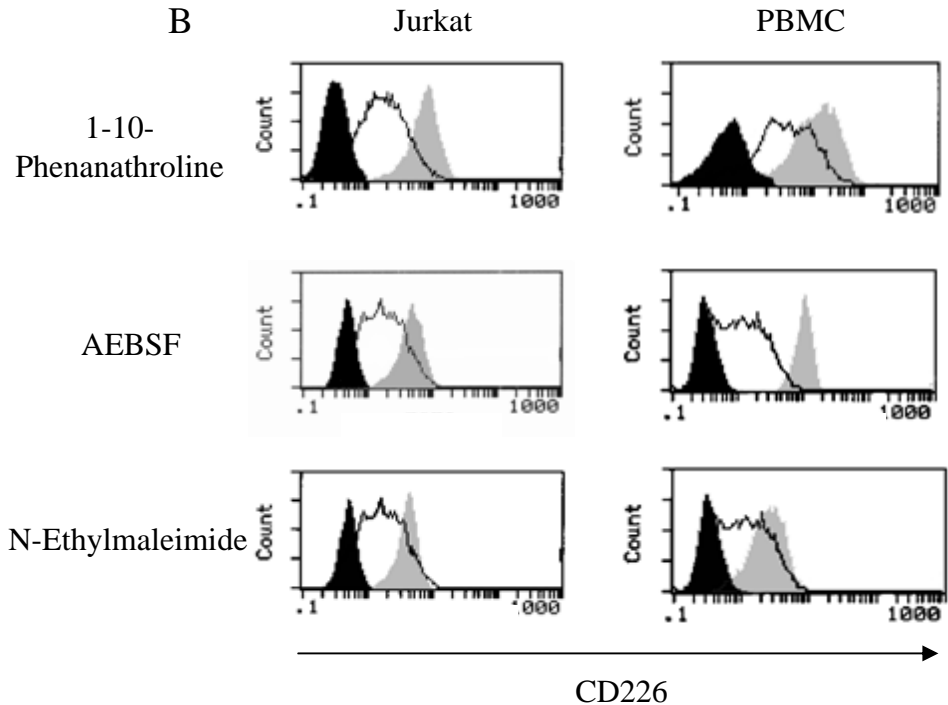

Supplement: MOESM3 [file 9427616]
